# Supplementary material for: The Impact of the Nucleosome Code on Protein-Coding Sequence Evolution in Yeast
Source: PLOS journal article supplement (doi:10.1371/journal.pgen.1000250), 2008-11-06
Supplement: S2 (10.1371/journal.pgen.1000250.s002) [file journal.pgen.1000250.s002]

Supplementary Table 1

Evolutionary rates of observed concatenated sequence (obs) and number of 10000 randomized (ran) concatenates, that show a Ka (Ks)  $\leq$  or  $\geq$  than the observed value  
also see Figures 1B and C

|      | Ka linker obs | Ka ran $\geq$ obs | as P value | Ks linker obs | Ks ran $\leq$ obs | as P value | Ka fuzzy obs | Ka ran $\leq$ obs | as P value | Ks fuzzy obs | Ks ran $\geq$ obs | as P value | Ka well-positio | Ka ran $\geq$ obs | as P value | Ks well-positio | Ks ran $\geq$ obs | as P value |
|------|---------------|-------------------|------------|---------------|-------------------|------------|--------------|-------------------|------------|--------------|-------------------|------------|-----------------|-------------------|------------|-----------------|-------------------|------------|
| 5'   | 0.0666        | 1365              | 0.1365     | 0.4833        | 0                 | 0          | 0.0539       | 0                 | 0          | 0.5152       | 7108              | 0.7108     | 0.0719          | 0                 | 0          | 0.5297          | 1                 | 1.00E-04   |
| core | 0.0517        | 36                | 0.0036     | 0.5637        | 2132              | 0.2132     | 0.042        | 0                 | 0          | 0.5741       | 6294              | 0.6294     | 0.0518          | 0                 | 0          | 0.5786          | 2425              | 0.2425     |
| 3'   | 0.0595        | 176               | 0.0176     | 0.5126        | 136               | 0.0136     | 0.0506       | 0                 | 0          | 0.5329       | 9763              | 0.9763     | 0.0605          | 0                 | 0          | 0.5527          | 5                 | 5.00E-04   |
